# Supplementary material
Source: Springer Nature journal article supplement (https://www.springermedizin.de/resource/supplementary/12936_2011_1690_MOESM6_ESM.pdf/9541518)

**A****B****C****D**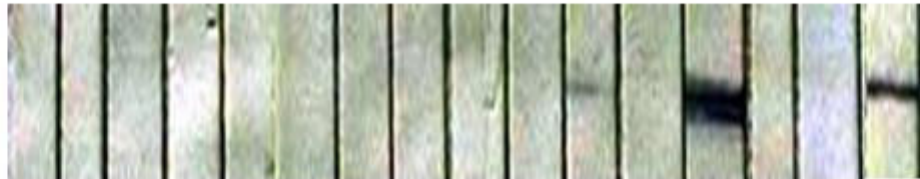

← MLC

|   |   |   |   |   |   |   |   |   |   |   |   |   |   |   |
|---|---|---|---|---|---|---|---|---|---|---|---|---|---|---|
| - | - | - | - | - | - | - | - | - | + | - | + | - | - | + |
|---|---|---|---|---|---|---|---|---|---|---|---|---|---|---|

Supplement: MOESM6 [file 9541518]
